# Supplementary material
Source: Springer Nature journal article supplement (https://www.springermedizin.de/resource/supplementary/12889_2011_3899_MOESM1_ESM.pdf/9490900)
Supplement: MOESM1 [file 9490900]

2969 Elementary Schools of the State of Mexico,  
beneficiaries of the breakfast school program DIFEM (\*)

**Randomized field trial**

60 Selected Schools

30 Intervention Schools

30 Control Schools

5th grade children  
(n=510)

(N=1019)

5th grade children  
(n=510)

Lost of  
information

BMI  
(n-1)

**Baseline  
Evaluation**

Supervision

BMI  
(n=509)

BMI  
(n=510)

Whithout  
Supervision

**3 months after**

9 changes of address  
2 losses of knowledge  
questionnaires

BMI  
(n-11)

BMI  
(n=498)

BMI  
(n-11)

BMI  
(n=499)

9 changes of address  
2 losses of  
questionnaires

(N=997)

**6 months later  
Final Evaluation**

(\*) Taken from the beneficiaries schools of the school breakfast program DIFEM 2009-2010 school period
